# Supplementary material for: Bilayer Lipid Membrane as Memcapacitance: Capacitance–Voltage Pinched Hysteresis and Negative Insertion Conductance
Source: MDPI journal article supplement (doi:10.3390/membranes13010097), 2023-01-11
Supplement: s1 [file s1]

## Supplementary materials

### 1S. Solution of a Nonlinear Differential Equation for the Equivalent Circuit of a Membrane as a Viscoelastic Dielectric

We write nonlinear equations for two half-cycles of a triangular voltage

$$\frac{d\tilde{U}_{up}}{dt}(1 + \beta\tilde{U}_{up}^2) + \frac{\tilde{U}_{up}}{\tau} = -\frac{U_{max}}{\tau} + \frac{kt}{\tau}, \quad 0 \leq t \leq \frac{T}{2} \quad (S1)$$

$$\frac{d\tilde{U}_{down}}{dt'}(1 + \beta\tilde{U}_{down}^2) + \frac{\tilde{U}_{down}}{\tau} = \frac{U_{max}}{\tau} - \frac{kt'}{\tau}, \quad 0 \leq t' \leq \frac{T}{2}, \quad (S2)$$

$$\text{where } \tau = (1 - \kappa)rC_0.$$

We will solve nonlinear equations (S1) and (S2) using the small parameter method. Let us introduce  $\mu$  ( $0 < \mu \ll 1$ ) – a positive small parameter and considering the coefficient of nonlinearity to be small and proportional to  $\mu$ , we will look for the solution of equations (S1) and (S2) in the form of a series in powers of the small parameter:

$$\tilde{U}_{up} = \tilde{U}_{up0} + \mu\tilde{U}_{up1} + \dots \quad (S3)$$

$$\tilde{U}_{down} = \tilde{U}_{down0} + \mu\tilde{U}_{down1} + \dots \quad (S4)$$

Substituting (S3), (S4) into equations (S1) and (S2) and equating terms with the same  $\mu$  degree, we obtain two linear differential equations that determine the voltage  $\tilde{U}$  for each half-cycle of the command voltage with accuracy up to the first order of smallness

$$\frac{d\tilde{U}_{up0}}{dt} + \frac{\tilde{U}_{up0}}{\tau} = -\frac{U_{max}}{\tau} + \frac{kt}{\tau} \quad (S5)$$

$$\frac{d\tilde{U}_{up1}}{dt} + \frac{\tilde{U}_{up1}}{\tau} = -\beta\tilde{U}_{up0}^2 \frac{d\tilde{U}_{up0}}{dt} \quad (S6)$$

$$\frac{d\tilde{U}_{down0}}{dt'} + \frac{\tilde{U}_{down0}}{\tau} = \frac{U_{max}}{\tau} - \frac{kt'}{\tau} \quad (S7)$$

$$\frac{d\tilde{U}_{down1}}{dt'} + \frac{\tilde{U}_{down1}}{\tau} = -\beta\tilde{U}_{down0}^2 \frac{d\tilde{U}_{down0}}{dt'} \quad (S8)$$

Solving equations (S5) and (S7), we obtain zero approximations

$$\tilde{U}_{up0}(t) = -U_{max} + k(t - \tau) + A_{up} \exp\left(-\frac{t}{\tau}\right) \quad (S9)$$

$$\tilde{U}_{down0}(t') = U_{max} - k(t' - \tau) + A_{down} \exp\left(-\frac{t'}{\tau}\right), \quad (S10)$$

where  $A_{up} = 2k\tau$  and  $A_{down} = -2k\tau$  are constants of integration, the values of which are found from periodic initial conditions  $\tilde{U}_{up0}(t = 0) = \tilde{U}_{down0}(t' = \frac{T}{2})$ ,  $\tilde{U}_{down0}(t' = 0) = \tilde{U}_{up0}(t = \frac{T}{2})$ .

Substituting (S9) and (S10) neglecting exponentials, into equations (S6) and (S8), we obtain two linear equations for the first approximation

$$\frac{d\tilde{U}_{up1}}{dt} + \frac{\tilde{U}_{up1}}{\tau} = -\beta k[(U_{max} + k\tau)^2 - 2kt(U_{max} + k\tau) + (kt)^2] \quad (S11)$$

$$\frac{d\tilde{U}_{down1}}{dt'} + \frac{\tilde{U}_{down1}}{\tau} = \beta k[(U_{max} + k\tau)^2 - 2kt'(U_{max} + k\tau) + (kt')^2] \quad (S12)$$

Substituting (S9), (S10) and particular solutions of linear equations (S11), (S12) into equations (S3) and (S4), we obtain expressions for the voltage across the capacitance  $C_1$  of the viscoelastic branch for the upward and downward half-cycles of the command triangular voltage

$$\tilde{U}_{up}(t) = (-U_{max} - k\tau + kt) + A_{up} \exp\left(-\frac{t}{\tau}\right) - \beta k\tau[U_{max}^2 + 4U_{max}k\tau + 5(k\tau)^2] + 2\beta k\tau(U_{max} + 2k\tau)kt - \beta k\tau(kt)^2, \quad (S13)$$

$$\tilde{U}_{down}(t') = (U_{max} + k\tau - kt') + A_{down} \exp\left(-\frac{t'}{\tau}\right) + \beta k\tau[U_{max}^2 + 4U_{max}k\tau + 5(k\tau)^2] - 2\beta k\tau(U_{max} + 2k\tau)kt' + \beta k\tau(kt')^2. \quad (S14)$$

## 2S. Solution of the differential equation for a ferroelectric

Nonlinear charge-voltage characteristics for a membrane  $q = C_0 U + \frac{\beta}{3} C_0 U^3$  and a ferroelectric  $U = \frac{1}{C_0} q + \frac{1}{C_0} \frac{\beta}{3} q^3$  are inverse functions. Let us find the nonlinear current response of the equivalent circuit with a ferroelectric to the upward half-cycle of the triangular command voltage and compare it with the expression (13) without taking into account the exponents. Differential equation for the charge in a non-linear circuit with delayed polarization:

$$r \frac{dq}{dt} + \frac{1}{C_0} q + \frac{1}{C_0} \frac{\beta}{3} q^3 = -U_m + kt, \quad 0 \leq t \leq \frac{T}{2} \quad (S15)$$

we look for the solution of equation (S15) in the form of a series in powers of the small parameter:

$$q(U) = q_0 + \mu q_1 + \dots \quad (S16)$$

Assuming in (S15)  $\frac{dq}{dt} = k \frac{dq}{dU}$ ;  $U = -U_m + kt$  ;  $\tau = rC_0$  we obtain two linear differential equations for describing processes in the nonlinear branch of the equivalent circuit for a ferroelectric.

$$\frac{dq_0}{dU} + \frac{q_0}{k\tau} = \frac{UC_0}{k\tau} \quad (S17)$$

$$\frac{dq_1}{dU} + \frac{q_1}{k\tau} = -\frac{1}{k\tau} \frac{\beta}{3} q_0^3 \quad (S18)$$

Substituting partial solutions of equations (S17) and (S18) into (S16), we obtain an expression for the charge

$$q = C_0(U - k\tau) - \frac{\beta}{3} C_0^3 U^3 + 2\beta C_0^3 U^2 k\tau - 5\beta C_0^3 U (k\tau)^2 + \frac{16}{3} \beta C_0^3 (k\tau)^3 \quad (S19)$$

The current response to the upward half-cycle of the triangular voltage without taking into account transients:

$$I_{oup} = k \frac{dq}{dU} + gU = kC_0 \left( 1 - \beta_{exp} C_0^2 (U^2 + 5(k\tau)^2) \right) + (g + 4\beta_{exp} k C_0^3 k\tau) U \quad (S20)$$
